# Supplementary material for: De novo assembly of red clover transcriptome based on RNA-Seq data provides insight into drought response, gene discovery and marker identification
Source: PubMed Central journal article supplement (PMC4144119; doi:10.1186/1471-2164-15-453), 2014-06-09

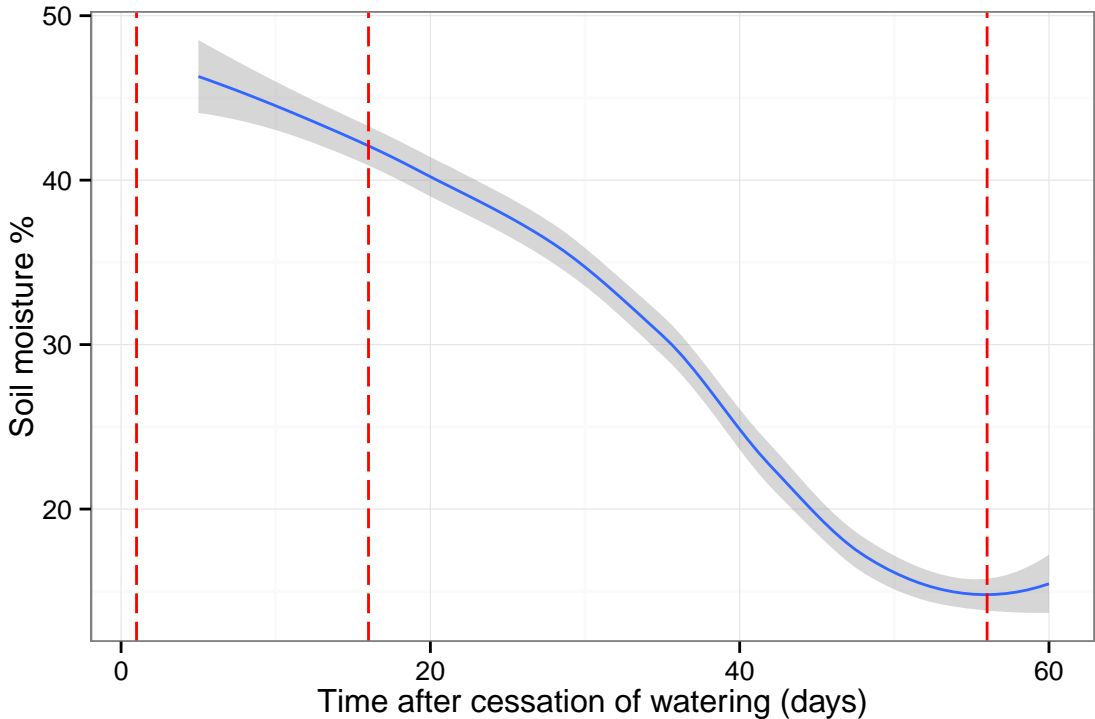

Supplement: 12864_2013_6182_MOESM1_ESM.pdf [file 12864_2013_6182_MOESM1_ESM.pdf]
